# Supplementary material for: Virtual Reality Transition to Underground: Human Responses across Sequential Spatial Transitions
Source: Research Square preprint supplement (doi:10.21203/rs.3.rs-8821554/v1), 2026-02-19
Supplement: Supplementary file 1 [file 4ad1362c0424e1bff6c1d991.docx]

S_Table 1. Items of IPQ

| Factors | Items | Seven-point Likert scale |
| --- | --- | --- |
| General presence | In the computer-generated world, I had a sense of “being there.” | 0 = not at all  6 = very much |
| Spatial presence | I somehow felt that the virtual world surrounded me. | 0 = not at all  6 = very much |
| I felt like I was just looking at pictures. | 0 = not at all  6 = very much |
| I did not feel present in the virtual space. | 0 = did not feel  6 = felt present |
| I had a sense of acting in the virtual space, rather than operating something from the outside. | 0 = fully disagree  6 = fully agree |
| I felt present in the virtual space. | 0 = fully disagree  6 = fully agree |
| Involvement | How aware were you of the real-world surroundings (i.e., sound, room temperature, etc.) while navigating in the virtual world? | 0 = extremely aware  6 = not aware at all |
| I was not aware of my real environment. | 0 = fully disagree  6 = fully agree |
| I still paid attention to the real environment. | 0 = fully disagree  6 = fully agree |
| I was completely captivated by the virtual world. | 0 = fully disagree  6 = fully agree |
| Experienced realism | How real did the virtual world seem to you? | 0 = completely real  6 = not real at all |
| Did your experience in the virtual environment seem consistent with your real-world experience? | 0 = not consistent  6 = very consistent |
| How real did the virtual world seem to you? | 0 = about as real as an imagined world  6 = indistinguishable from the real world |
| The virtual world seemed more realistic than the real world | 0 = fully disagree  6 = fully agree |
